# Supplementary material for: SnSe quantum dots anchored on few-layered Ti3C2 as anodes for sodium ion batteries with enhanced cycling stability
Source: Royal Society of Chemistry journal article supplement (doi:10.1039/d3nj00501a), 2023-01-01
Supplement: d3nj00501a1.pdf [file d3nj00501a1.pdf]

## Supporting Information

# SnSe Quantum Dots Anchored on Few-layered $\text{Ti}_3\text{C}_2$ as Anodes for Sodium Ion Batteries with Enhanced Cycle Stability

*Guoxu Ni<sup>a</sup>, Yingjie Zhang<sup>a</sup>, Yuzheng Li<sup>a</sup>, Chengxiao Xu<sup>a</sup>, Jinjie Zhang<sup>a</sup>, Peipei Huo<sup>a,\*</sup>, Bo Liu<sup>a,\*</sup>*

<sup>a</sup>Laboratory of Functional Molecules and Materials, School of Physics and Optoelectronic Engineering, Shandong University of Technology, Zibo 255000, China

\* Corresponding authors at: Laboratory of Functional Molecules and Materials, School of Physics and Optoelectronic Engineering, Shandong University of Technology, Zibo 255000, China.

*E-mail* addresses: [peipeihuo@sdut.edu.cn](mailto:peipeihuo@sdut.edu.cn) (Peipei Huo); [liub@sdut.edu.cn](mailto:liub@sdut.edu.cn) (Bo Liu).

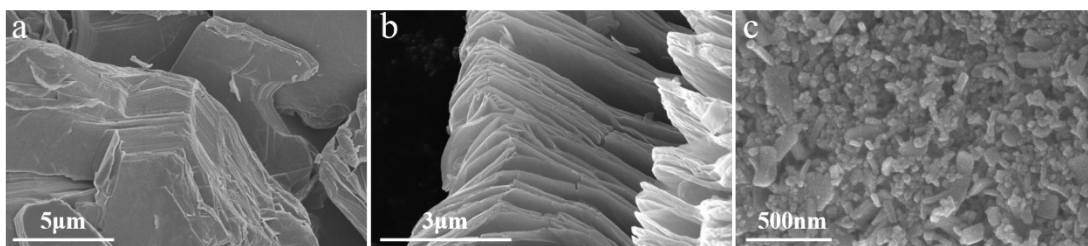

**Figure. S1.** SEM images of (a)  $\text{Ti}_3\text{AlC}_2$  MAX. (b)  $m\text{-Ti}_3\text{C}_2$ . (c) P-SnSe

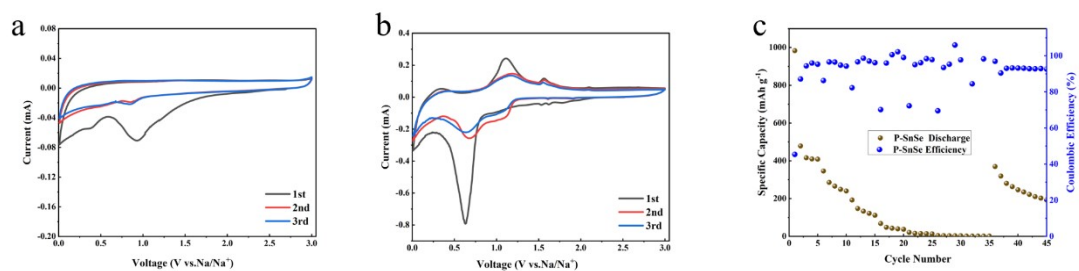

**Figure. S2.** CV curves of (a)  $f\text{-Ti}_3\text{C}_2$  and (b) P-SnSe at a scan rate of  $0.1 \text{ mV s}^{-1}$ . (c) Rate performance of P-SnSe electrode.

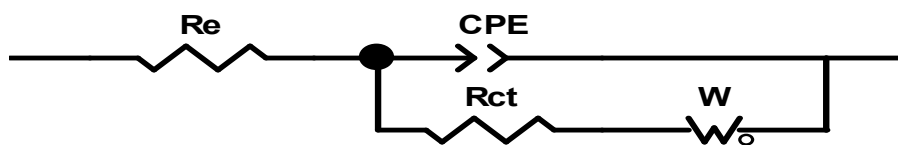

**Figure. S3.** The equivalent circuit of EIS.

|                                       | Re           | Rct          | CPE-T             | CPE-P | W-R   | W-T  | W-P  |
|---------------------------------------|--------------|--------------|-------------------|-------|-------|------|------|
|                                       | ( $\Omega$ ) | ( $\Omega$ ) | ( $\mu\text{F}$ ) | (m)   | (DW)  | (DW) |      |
| SnSe@f-Ti <sub>3</sub> C <sub>2</sub> | 6.72         | 184          | 1.65E-5           | 0.71  | 190.4 | 0.32 | 0.32 |
| P-SnSe                                | 5.70         | 358          | 3.36E-6           | 0.86  | 4221  | 81.9 | 0.56 |

**Table S1.** Impedance parameters for the equivalent circuits

The relationship between the peak current ( $i$ ) and the scan rate ( $v$ ) obeys the power law of

$$i = av^b \quad (1)$$

The intrinsic charge storage kinetics of the electrode can be qualitatively reflected by the  $b$  value, which is the fitting slope of  $\log(i)$  to  $\log(v)$  curve. The  $b$  values of 0.5 and 1 correspond to the diffusion-controlled process and the surface-controlled pseudocapacitive reaction, respectively.

In addition, the two contributions at different scan rates can be quantitatively distinguished as follows:

$$i = k_1v + k_2v^{1/2} \quad (2)$$

$k_1v$  and  $k_2v^{1/2}$  represent the contributions of pseudocapacitance and diffusion control, respectively.

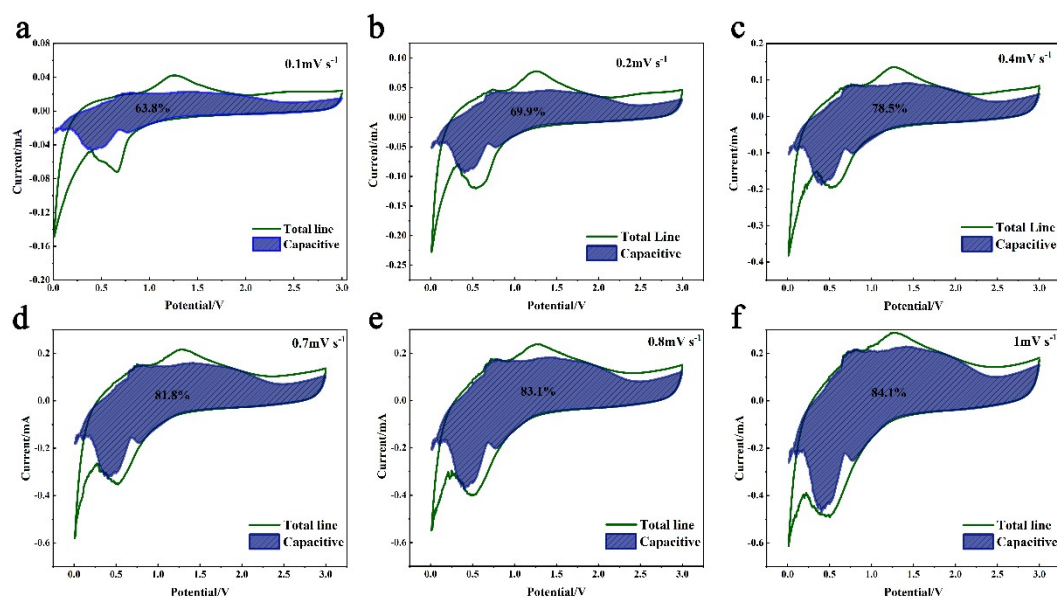

**Figure. S4.** Separation of capacitive and diffusion-controlled contribution areas at different scanrate: (a) 0.1, (b) 0.2, (c) 0.4, (d) 0.7, (e) 0.8 and 1  $\text{mV s}^{-1}$  of  $\text{SnSe}@f\text{-Ti}_3\text{C}_2$ .
